# Supplementary material
Source: publisher figshare collection journal article supplement (https://karger.figshare.com/ndownloader/files/26614214)
Supplement: Supplementary file 1 [file 26614214]

**Appendix 2.**

**Neocosur Neonatal Network Collaborators:**

**Argentina:**

**Clinica y Maternidad Suizo Argentina, Buenos Aires**: Ana Pedraza, Luis Prudent, Guillermo Colantonio, Gastón Pérez, Jorge Zapata, Tomas Fortunato.

**Hospital Italiano, Buenos Aires:** Carlos Fustiñana†, Gonzalo Mariani, Silvia Fernández Jonusas, Pablo Brener, María Paola Carrascal, María Fernanda Galletti, Diana Rodríguez.

**Hospital** **Juan Fernández, Buenos Aires:** Jorge Tavosnaska, Liliana Roldan, Hector Sexer, Gladys Saa, Debora Sabatelli, María Laura Gendra, Graciela Basso, Paula Molina, Teresa Sepúlveda, Maria Fernanda Busrachi.

**Hospital Lagomaggiore, Mendoza:** Gladys Ferreyra, Mónica Rinaldi, Daniel Agost, Rubén Chisari,Gabriela Torres, Mónica Andrada.

**Maternidad Sardá, Buenos Aires:** Claudio Solana, Carlos Grandi, Javier Meritano, Elio Rojas, Miguel Larguía, Ricardo Nieto, Mónica Brundi, Laura Kasten, Silvana Vivas, Alejandra Fiorentino.

**Sanatorio de la Trinidad, Buenos Aires**: Nestor Vain, Cecilia García, Marcelo Decaro, Lionel Cracco, Noemí Jacobi, Edith Martínez, María San Miguel, Andrea Brum, Fabiana Herbón.

**Hospital Universitario Austral, Buenos Aires:** Gabriel Musante, Rodolfo Keller, Leila Acha, María Carola Capelli, Estela Quintana, Magdalena De Elizalde, Juan Ignacio Fraga, Juan Pablo Berazategui, Luis Fabián Pérez.

**Hospital Nuestra Señora de la Misericordia, Córdoba:** Luis Ahumada, Mirta Ferreyra, Laura Sánchez, Adriana Mitrano, Grissell González, Mariela Mícolo, Graciela Andino, Patricia Palacios, Alejandra Faner.

**Hospital Español de Mendoza, Mendoza:** Horacio Roge, Daniel Abdala, Damián Pretz, Martín Guida, Daniel Agost, Ignacio Roge, Lorena Gamboa, Marcela Otárola.

**Clínica** **Universitaria** **Reina** **Fabiola, Córdoba:** Ignacio Sosa, Carlos Maure, Débora Wainzstein, María Van Ooteghem.

**Hospital Escuela Eva Perón, Buenos Aires:** Alberto Bianchi,Daniela Mutti, Claudio Petruzzi, Fernando Basualdo, Sonia Gallina, María Cecilia Calabrese,

Miriram Duarte, Pedro Rodríguez, Alicia Cativa.

**Brasil:**

**Hospital Universitario UFMA:** Marynea do Vale**,** Vanda Maria Ferreira, Silvia Cavalcante de Sousa, Patricia Franco Marquez, M. José Silva, Rosangeles Fernández, Lucena Batista, Roberta Borgues Correia de Arburquerque.

**Chile:**

**Hospital Clínico Universidad Católica de Chile, Santiago:** Paulina Toso, Daniela Masoli**,** Jorge Fabres, Alvaro González, José L Tapia, Alberto Toso, Alberto Estay, Soledad Urzúa, Javier Kattan.

**Hospital Clínico Universidad de Chile, Santiago:** Luis Hernán González, Jaime Burgos, M. Eugenia Hübner, Rodrigo Ramírez

**Hospital Guillermo Grant, Concepción:** Jorge León del Pedregal, Claudia Aburto, Lilia Campos, Roxana Aguilar, Sergio Treuer, Horacio Contreras, Lilian Cifuentes, Aldo Bancalari, Jimena Giaconi.

**Hospital Gustavo Fricke, Viña del Mar:** Jane Standen, Marisol Escobar**,** Alejandra Nuñez, Daniela Sandino, Viviana Veas, Priscila Durán.

**Hospital San José, Santiago:** Agustina González, Claudia Avila, Lorena Tapia.

**Hospital Dr. Sótero del Río, Santiago:** Patricia Mena, Juan Pablo Cortés, Claudia Toro, María José Escalante, Beatriz Milet, Marcela Díaz, Romy Olate.

**Hospital San Borja Arriarán, Santiago:** Verónica Peña,Dagoberto Pizarro,Mirna García, Rafael Mendizabal, Raúl Vélez, María Caballero.

**Hospital de Puerto Montt, Puerto Montt:** Rodrigo Donoso**,** Patricia Álvarez, Hugo Ochoa**,** Johanne Jahnsen, Erika Ortiz, Rosa Pérez, Virginia Alpaca, M. Eugenia Aguirre, Isabel Humaña, Gerardo Flores, Jaime García, Ivian Blanco, Mauricio Marín, Manuel Paredes.

**Hospital Regional de Antofagasta, Antofagasta:** Carmen Díaz, Ximena Sandoval, Marcelo Sepúlveda, Sergio Farías, Carola Aguirre, Jocelyn Tapia, Jacqueline Urquieta.

**Hospital Carlos Van Buren, Valparaíso:** María Isabel Saldes, Miguel Aravena,Paula Gajardo, Eduardo Ahumada, Montserrat Vásquez.

**Paraguay:**

**Hospital de Clinicas, Asunción:** Ramon Mir, José María Lacarruba, Larissa Genes, Elizabeth Céspedes, Elvira Mendieta.

**Hospital San Pablo, Asunción:** Rosanna Fonseca, Larissa Genes, Leticia Zapata, Sonia Pereira.

**Perú:**

**Hospital Cayetano Heredia, Lima:** Verónica Webb, Jaime Zegarra, Patricia Delgado, Fabiola Rivera, Marilu Rospigliosi, Margarita Llontop, Sandra Rado, Lilian Chancafe.

**Hospital Guillermo Almenara, Lima:** César García, Oscar Chumbes, Jorge Mucha,Anne Castañeda, Rubén Ramos, Walter Cabrera, Raúl Llanos, Nadia García.

**URUGUAY:**

**Facultad de Medicina Servicio de Recién Nacidos Pereyra Rossell, Montevideo:**  Daniel Borbonet, Beatriz Ceruti, Sandra Gugliucci,Ana Laín, Gabriela Bazan, Marisa Martínez, Ricardo Tambasco, Micaela Murillo, Elsa Arocena, Karla Borda.

**Data Base Office**: Ivonne D`Apremont, José L Tapia, Mariela Quezada, Solange Rojas, Guillermo Marshall, Angélica Domínguez, Claudia Musalem, Luis Villarroel.

**Hospitals and researchers from the Spanish Neonatal Network SEN1500:**

Complejo Hospitalario Albacete (Andrés Martínez Gutiérrez); Hospital U. de Basurto (Alberto Pérez Legorburu); Hospital Bierzo (María Teresa Prada); Hospital Cabueñes (Rafael García Mozo); Hospital Carlos Haya (Tomás Sánchez Tamayo); Hospital General Castellón (Ramón Aguilera Olmos); Hospital Central Asturias (Belén Fernández Colomer); Hospital Clínic Barcelona (Josep Figuera Aloy); Hospital Clínico San Carlos (Araceli Corredera Sánchez); Hospital Cruces (Amaya Rodríguez Serna); Hospital U. Donostia (M. Ángel Cortajarena Altuna); Hospital Elche (Josep Mut Buigues); Hospital General de Cataluña (Laura Castells Vilella); Hospital G. de Granollers (Israel Anquela Sanz); Hospital Germans Trias i Pujol (W. Coroleu); Hospital Getafe (Lucía Cabanillas Vilaplana); Hospital Infanta Margarita (José María Barcía Ruiz); Hospital Jerez (Dolores Esquivel Mora); Hospital Juan Ramón Jiménez (José Ángel Morilla Sánchez); Hospital Juan XXIII (Mar Albújar); Hospital León (Emilio Álvaro Iglesias); Hospital Miguel Servet (Segundo Rite Gracia); Corporació Parc Taulí (Juan Badia); Hospital San Juan de Deu (Martín Iriondo Sanz); Hospital San Pedro de Logroño (Inés Esteban Díez); Hospital San Pedro de Alcántara (Mª Jesús López Cuesta); Hospital de la Santa Creu i Sant Pau (Gemma Ginovart Galiana); Hospital Severo Ochoa (María José Santos Muñoz); Hospital Txagorritxu (María Mercedes Martínez Ayucar); Hospital Universitario Arnau de Vilanova (Eduard Solé Mir); Hospital Valme (Antonio Gutiérrez Benjumea); Hospital Virgen de la Concha (Víctor Marugán Isabel); Hospital U. Virgen de la Macarena (Mercedes Granero Asencio); Hospital Virgen de la Salud (Alicia de Ureta Huertas); Hospital U. Virgen de las Nieves (Mª Fernanda Moreno Galdó); Hospital Xeral Vigo (María Suárez Albo); Hospital Universitario de Valencia (Javier Estañ Capell); Hospital Universitario de Zaragoza (Purificación Ventura Faci); Hospital Universitario Santiago (Mª Luz Couce Pico); Hospital General de Burgos (Cristina de Frutos Martínez); Hospital General Universitario Alicante (Miriam Salvador Iglesias); Hospital Universitario de Fuenlabrada (Laura Domingo Comeche); Hospital Universitario Gregorio Marañón (Amparo Rodríguez Herreras); Hospital Universitario La Paz (Mª Dolores Elorza); Hospital Materno Infantil de Canarias (Lourdes Urquía Martí);Hospital Universitario Canarias (Pedro A. Fuster Jorge); Hospital Universitario de San Cecilio (Eduardo Narbona); Hospital Universitari i Politecnic La Fe (Isabel Izquierdo Macián); Hospital Universitario Reina Sofía (Juana María Guzmán Cabañas); Hospital Universitario Río Hortera (Mª Mar Montejo Vicente); Hospital Universitario Salamanca (Pilar García González); Hospital Universitario Virgen del Rocío (Carmen Macías Díaz); Hospital Universitario Dexeus (Roser Porta); Scias-Hospital Barcelona (Silvia Martínez-Nadal). Hospital Josep Trueta (Alberto Trujillo); Complejo Hospitalario Universitario de Pontevedra (Javier Vilas González); Hospital Universitario de Ciudad Real (Miguel Ángel Cabezas); Hospital Puerta del Mar (Antonio Segado Arenas).
